# Supplementary material
Source: PubMed Central journal article supplement (PMC7205566)
Supplement: NIHMS1546033-supplement-Supp.pdf [file NIHMS1546033-supplement-Supp.pdf]

**Supplemental Table 1.** Neuropsychological Measures

| Domain/Function    | Test/Measure                      | Description<br>(maximum score possible)      | Citation                 |
|--------------------|-----------------------------------|----------------------------------------------|--------------------------|
| Attention          | Digit Span Forward                | Total correct trials<br>(12)                 | (D. Wechsler,<br>1987)   |
|                    | Digit Span Backward               | Total correct trials<br>(12)                 |                          |
| Processing speed   | Digit Symbol                      | Total no. items<br>completed in 90 s<br>(99) | (A. Wechsler,<br>1987)   |
|                    | Trail Making Test Part A          | Total time (150 s)                           |                          |
| Executive function | Trail Making Test Part B          | Total time (300 s)                           | (Reitan, 1993)           |
| Episodic memory    | Logical Memory IIA Delayed Recall | Total story units<br>recalled (25)           | (Wechsler,<br>1987)      |
|                    | Benson Figure Delayed Recall      | Total score for<br>drawing (17)              |                          |
| Language           |                                   |                                              |                          |
| Verbal fluency     | Semantic fluency (animals)        | Total items in 1<br>min (no<br>maximum)      | (Morris et al.,<br>1989) |

Letter fluency

Total items in 1  
min (no  
maximum)

Naming

Boston Naming Test (30 items)

Total correct (30)

(Kaplan,  
Goodglass, &  
Weintraub,  
1983)

---

**Supplemental Table 2.** Factor loadings from principal component analysis of neuropsychological tests

---

|                                   | Component 1 (Cognition) |
|-----------------------------------|-------------------------|
| Logical Memory IIA Delayed Recall | 0.325                   |
| Digit Span Backward               | 0.556                   |
| Semantic Fluency (animals)        | 0.61                    |
| Trail Making Test Part A          | -0.766                  |
| Trail Making Test Part B          | -0.833                  |
| Digit Symbol                      | 0.815                   |
| Total % Explained Variance        | 45.5%                   |

---

*Note.* Factors with eigenvalues greater than 1, with a maximum iteration of 25, were extracted. Factor loadings shown without rotation.

*Note.* The Kaiser-Meyer-Olkin (KMO) measure of sampling adequacy = .80.

**Supplemental Table 3.** Relations among informant variables

|                               | Chi-Square Value | Cramer's V |
|-------------------------------|------------------|------------|
| Cohabitation x race/ethnicity | 206.60*          | 0.221      |
| Cohabitation x sex            | 80.67*           | 0.137      |
| Cohabitation x relationship   | 3298.79*         | 0.876      |
| Cohabitation x education      | 7.24             | 0.042      |
| Race/ethnicity x sex          | 16.07*           | 0.062      |
| Race/ethnicity x relationship | 483.11*          | 0.169      |
| Race/ethnicity x education    | 184.77*          | 0.124      |
| Sex x relationship            | 109.04*          | 0.159      |
| Sex x education               | 32.31*           | 0.089      |
| Relationship x education      | 73.82*           | 0.078      |

\* $p < .005$ .
